# Supplementary material for: Characterization of zinc uptake by mouse primary cultured astrocytes and microglia
Source: Royal Society of Chemistry journal article supplement (doi:10.1039/c5mt00085h), 2015-04-20
Supplement: c5mt00085h2.pdf [file c5mt00085h2.pdf]

**Electronic Supplementary Information for Manuscript MT-ART-03-2015-000085**

**Figure S1. Effect of tracer levels of  $^{65}\text{Zn}$  on its uptakes by mouse astrocytes.**

Astrocytes were preincubated in buffer B for 10 min at 37°C, and then incubated with 0.25-2.5 nM  $^{65}\text{ZnCl}_2$  plus 50 nM  $\text{ZnCl}_2$  for 1 or 60 min at 37°C. The reaction was terminated by the addition of an excess volume of ice-cold buffer A, and then cellular  $^{65}\text{Zn}$  uptake was determined. Each point represents the mean  $\pm$  SD (N=3).
